# Supplementary material for: In vivo single-cell lineage tracing in zebrafish using high-resolution infrared laser-mediated gene induction microscopy
Source: eLife. 2020 Jan 6;9:e52024. doi: 10.7554/eLife.52024 (PMC7018510; doi:10.7554/eLife.52024)
Supplement: Figure 1—figure supplement 2—source data 1. [file elife-52024-fig1-figsupp2-data1.xlsx]

## Sheet: Sheet1
Figure1-figure supplement2B
FITC dextran	TAMRA dextran
Unit: %/℃
-0.0246	-0.762
-0.253	-0.829
-0.122	-0.807
-0.292	-0.896
-0.14	-0.923
-0.281	-0.981
-0.125	-1.042
-0.0835	-0.848
--	-0.794
--	-0.788
--	-1.029
