# Supplementary material for: In vivo single-cell lineage tracing in zebrafish using high-resolution infrared laser-mediated gene induction microscopy
Source: eLife. 2020 Jan 6;9:e52024. doi: 10.7554/eLife.52024 (PMC7018510; doi:10.7554/eLife.52024)
Supplement: Figure 2—figure supplement 4—source data 1. [file elife-52024-fig2-figsupp4-data1.xlsx]

## Sheet: Figure S7
Figure 2-figure supplement 4A-C
Muscle_95mW				Vessel_100mW				Brain_110mW				Muscle_80mW				Vessel_80mW				Brain_95mW				Muscle_80mW
Lateral Temperature (℃)				Lateral Temperature (℃)				Lateral Temperature (℃)				Lateral Temperature (℃)				Lateral Temperature (℃)				Lateral Temperature (℃)				Axial Temperature (℃)
P00	P10	P20		P00	P10	P20		P00	P10	P20		P00	P10	P20		P00	P10	P20		P00	P10	P20		P00	P10	P20
54.4	36.7	31.6		42.5	43.3	31.8		46.8	45.8	36.4		38.2	30.4	28.4		41.4	30.8	29.3		45.9	34.8	34.8		41.2	37.3	33
57.4	40.7	34.4		48.2	35.6	34.7		52.2	38.6	34.8		47.6	31.9	25.5		42.4	34.7	29.8		44.3	35.7	37.2		39.7	36.7	31
47.5	40.7	32.5		42.4	38.5	36.6		52	42.8	33.2		41.8	30.8	29.5		42.4	31.8	33.2		50.5	43.5	34.8		44.1	36.4	32.8
52.5	42.7	32.6		47.2	40.5	34.6		53.8	38.8	32.9		40.8	32.4	28.5		40.6	31.7	31.3		42.7	35.6	35.2		46.8	36	33.5
48.5	37.8	33.5		40.5	44.4	29.8		49	41.1	38.8		40.2	32	29.3		37.6	32.4	28.4		41.1	40.4	36.8		43.8	35.4	31.1
52.5	33.8	33.6		45.4	43.3	29.7		45.9	38.8	36.3		40.6	31.8	25.5		39.5	30.7	27.4		42.8	37.2	35.6		45.5	34.5	30.5
51	33.8	33.6		53.1	35.7	37.6		48.3	41.9	33.3		49.5	33.4	31.3		37.5	31.7	26.4		49	40.3	32.5		41.9	39.8	34.6
51.5	37.7	33.5		43.4	32.7	33.7		45.1	44.2	42.7		47.5	35.6	29.4		37.6	31.7	27.4		42.7	38	36.4		42	37	34.4
53	42.6	34.4		45.3	41.5	32.7		52.1	44.3	39.5		41.2	33.8	29.3		42.8	31.8	30.3		44.4	43.4	38.8		43.5	38.5	34.2
52.4	39.2	31.5		48.3	40.5	37.5		49.2	40.4	32.5		44.1	30.7	27.5		40.4	31.7	29.4		41.9	34	31.3		40.4	34.7	32.6
52	36.8	32.6		47.3	43.4	31.7		42.6	38.6	34.1		42.6	33.6	27.4		39.6	32.8	32.2		45.8	43.5	30.9		42.7	36.7
47.7	38.8	33.6		54	40.4	32.8		50.5	38.7	40.4		42.7	30.9	25.4		43.4	31.8	29.2		41.9	41.1	32.4			36
50.6	39.7	34.3		56	42.4	36.5		52.2	38.7	41.9		48.1	34.7	29.4		42.7	33.1	29.3		48.2	36.4	36.3
58.4	38.7	34.5		48.2	32.8	30.8		49.7	43.5	34		42.3	32	28.4		43.5	29.8	27.3		50.6	36.3	32.5
49.6	38.7	30.6		42.4	40.4	33.7		42.5	42.7	33.2		46.6	32.8	26.4		35.6	34	28.3		44.2	37.2	37.1
47.6	40.6	33.7		52.1	38.6	40.5		43.5	45.9	40.3			34.1	27.4		40.5	31.9	28.3		46.6	34.9	32.4
49.5	35.8	33.4		49.2	34.7	34.7		43.4	45.8	41.1			32.3	30.3		42.5	33.6	29.3		40.3	37.9	34.9
50.6	37.7	32.5		44.4	43.4	31.7		44.2	40.3				34.8			38.5	34.3	30.2		47.4	34.1	34.9
48.6		33.4		49.2		33.6		47.5	45.7				31			38.6	31.6	29.4		42	41.9	34
51.5				43.3				42.8	38.9				33.9			42.6	31.8			40.3	38.8	35.7
53.5				54.1				51.4	45.9				34.2			42.5	31.7			47.4	36.4	33.2
51.4				49.3				45.8	41.2				27.9			43.4	32.7			44.2	38.7
53.5								43	38.9				30.8			40.5	33.2			47.5	34.8
47.4								42.7	45				33.3			41.1	32.7			44.3	37.1
47.5								48.3	44.2							41.5	31.6			42.8
48.6								48.2	45.8							43.3	33.4			45.1
57.3								51.3	45							40.4	32.6			40.4
50.5								53.7	41.9								31.6
47.4								42.8	45.1								33.3
53.4								50.6	44.3								33.9
55.9								48.2	38.8								34.2
50.4								47.5	45.1								30.9
46.6								52.9	38.7								31.5
54.9								53	45.1								31.9
50.5								44.3	38.8								32.7
49.5								52.3	48.2								31.5
								49.8	43.4								31.8
								42.7	39.5								33.2
								50.6	46								31.7
								48.9	47.4								32.8
								49.8	42.7								32.5
								53.7	45.9								34.1
								50.5	42
								49
								47.6
								47.4
								53.8
								46.6
								49.1
								46.7
