# Supplementary material for: In vivo single-cell lineage tracing in zebrafish using high-resolution infrared laser-mediated gene induction microscopy
Source: eLife. 2020 Jan 6;9:e52024. doi: 10.7554/eLife.52024 (PMC7018510; doi:10.7554/eLife.52024)
Supplement: Figure 2—source data 1. [file elife-52024-fig2-data1.xlsx]

## Sheet: Sheet1
Figure 2 A-D
Lateral temperature distribution in water_point heating										Axial temperature distribution in water_point heating
0 um	5 um	10 um	20 um	30 um	40 um	50 um	60 um	70 um		0 um	2.5 um	5 um	8 um	11 um	14.5 um	18 um
30.9	30.4	30.5	30.6	30.4	29.8	29.9	29.4	29		30.1	29.5	30.1	29.4	29.6	30.2	29.3
30.5	30.7	30.2	30	30	30	29.2	29.1	28.8		30.1	29.9	29.6	29.4	29.4	30.2	29.8
30.4	30.4	30.9	30.6	29.8	29.7	29.4	29	28.6		29.6	30.3	30.2	30.3	29.5	30	29.5
30.4	30.5	30.1	30.5	30.3	29.6	29.2	29	28.2		29.8	30.3	29.8	29.7	29.7	29.9	29.6
30.6	30.6	30.7	30.4	30.2	29.8	29.5	29.1	28.7		29.4	29.6	29.9	29.4	29.9	29.7	29.1
										30.4	29.9	29.5	29.6	29.9	29.4	29.6
										30	30	29.6	29.9	29.9	29.5
										30.5	29.8	29.8	30.4	29.3	29.2
															28.8
															29.2
Lateral temperature distribution in agarose_point heating										Axial temperature distribution in agarose_point heating
0 um	5 um	10 um	20 um	30 um	40 um	50 um	60 um	70 um		0 um	2.5 um	5 um	8 um	11 um	14.5 um	18 um
59.5	54.1	49.1	44.1	41.9	39.6	38.3	36.2	35.4		58.8	58	56.7	54.4	53.5	51.9	51.3
59.5	53.7	48.6	44.1	41.3	39.5	37.8	36.1	35.2		59.1	58.7	56.4	54.7	53.3	51.6	51.1
59.1	54.2	49.1	44.4	41.8	40.1	38.8	37	35.9		59.3	58.5	56.5	54.2	53.3	52.4	51.1
59.4	53.8	49.3	43.9	41.6	40.3	38.8	36.5	35.5		58.8	58.3	56.8	54.4	53	51.4	50.6
59.7	53.9	49	44.1	41.6	39.8	38.4	36.5	35.5		59.3	58.4	56.5	54.4	53.1	51.9	51
59.9										58.8
58.9
59.2
59.4
Lateral temperature distribution in agarose_scan heating										Axial temperature distribution in agarose_scan heating
0 um	10 um	20 um	30 um	40 um	50 um	60 um	70 um			0 um	2.5 um	5 um	8 um	11 um	14.5 um	18 um
53	46	39.8	38.6	36.5	36	34.9	33			52	51	48.1	48.7	47.8	45.6	44.6
53.5	44	38.8	38.1	36.7	34	34	34			54	52.2	51.6	49.7	48.6	46	44.6
52.3	43	39	39.2	37.8	34.9	34.8	34			50.3	53	52.2	49.5	42.9	46	44.9
51.5	44	40.4	37.5	36.3	35.8	34.3	32.6			53.8	49	48.7	47.5	48.4	46.2	43.5
55.8	44.5	41.9	37	35.8	34.6	34	33			51.6	52.8	51.2	49.9	44.9	46	45.5
55.5	45	42.2	39	35.5	35	33.7	33.5			52.4	51.6	47	49.5	47.7	45.6	45
51.5	43	40	37.7	36	34	33.6	32.5			51	52.7	51.4	49.5	48.2	46.2	43.5
55	44.5	39.5	38	36	35	34.7	33.2			54	53.2	47.6	47	47.6	45	40.8
55.5	42.7	39	38	36.5	35.5	33	32.5			51.7	49.7	51.5	46.2	47.3	45.5	45
54	47.7	40.7	37	36	34.9	33.4	32.9			53.4	53	51	50	48.6	44.9	41.5
52.5	48.2	40.7	37.5	36	33.7	33.5	34			52.2	50.5	51.8	49.5	48.8	45.5	45
54	42.2	40	38	38.1	34.5	33.5	33.8			52.2	51	51.5	50.7	46.9	43.5	44.2
52.5										52.7	52.2	52	48.3	48	44.2	45.2
53.5										49.7	53.3	49.7	46.9	48.8	46	45.2
56.2										54				48.3
52										51				45.2
51.8										52
52										52
53										53.5
51.5										52.2
55.5										52
52.5										51
52
55.5
Lateral temperature distribution in zebrafish_scan heating										Axial temperature distribution in zebrafish_scan heating
0 um	10 um	20 um	30 um	40 um	50 um	60 um	70 um			0 um	2.5 um	5 um	8 um	11 um	14.5 um	18 um
53	41	38	31	31	31	29	28			51	47	43.5	41	39.5	40.5	35.5
51	38	34.5	34	36	31	29	30			53	50	50	42.5	41	43	36
54	40	34	33	35	29	34	28			53.5	48	43.5	46	40	41.5	43
59	39	37	32	31	35	32.5	29			52.5	49	43	43	42	39.5	40
48	43	35	33	31	34	30	29			50	48.5	43.5	46	44	40	38.5
49	38	36.5	33	35	32	35	28.5			52	49	43.5	45	44	41.5	41.5
51	37	35	33	31	35	29	28			52	39	50	44	45		39
52	41	36	34	35.5	29	31	31			48	53.5	52	47	44		43
54	36		40		30	33	30			49	53	48	47.5	40.5		41
48	41				32	31	27			50	49.5	46	43.5	42.5
55.5	37				29	28				54		41.5		43.5
58	39					28				57		45
58	39									47.5		46.5
51	39.5									44		43
53	38									43.5
50										55
56.5										46.5
51.5										51
55										51
51										51.5
50										53
