# Supplementary material for: In vivo single-cell lineage tracing in zebrafish using high-resolution infrared laser-mediated gene induction microscopy
Source: eLife. 2020 Jan 6;9:e52024. doi: 10.7554/eLife.52024 (PMC7018510; doi:10.7554/eLife.52024)
Supplement: Figure 3—figure supplement 1—source data 1. [file elife-52024-fig3-figsupp1-data1.xlsx]

## Sheet: Sheet1
	Figure 3-figure supplement 1B
	the distance between the nuclei of neighboring endothelial cells
	29.7
	23.6
	24
	40.4
	25.2
	41.1
	34.7
	15.4
	11.2
	18.6
	30.8
	22.4
	33.6
	15.2
	26.2
	26.5
	31.2
	17.1
	25.1
	29.2
	27.2
	39.8
	20.6
	28.4
	36.2
	23
	11.6
	13.1
	14.7
	27.2
	21.5
	29.8
	19.9
	25.1
	36.8
	16.2
	20.2
	22.1
	26.4
	24.2
	36.9
	23.3
	23.2
	11.4
	41.4
	13.5
	23.7
	25.3
	26.5
	18.3
	13.2
	40.5
	20.3
	24.3
