# Supplementary material for: In vivo single-cell lineage tracing in zebrafish using high-resolution infrared laser-mediated gene induction microscopy
Source: eLife. 2020 Jan 6;9:e52024. doi: 10.7554/eLife.52024 (PMC7018510; doi:10.7554/eLife.52024)
Supplement: Figure 3—figure supplement 3—source data 1. [file elife-52024-fig3-figsupp3-data1.xlsx]

## Sheet: mpeg1 lyz cor
Figure 3-figure supplement 3D
Tg(mpeg1:DsRed;coro1a:GFP)	mpeg1	coro1a	co	co/coro1a
fish1	63	80	44	0.55
fish2	70	90	58	0.644444
fish3	80	113	68	0.60177
Tg(lyz:DsRed;coro1a:GFP)	lyz	coro1a	co	co/coro1a
fish1	40	105	24	0.228571
fish2	62	147	45	0.306122
fish3	46	138	35	0.253623
Tg(mpeg1:DsRed;lyz:GFP)	mpeg1	lyz	co	co/mpeg1
fish1	40	24	0	0
fish2	38	13	0	0
fish3	55	31	0	0
