# Supplementary material for: In vivo single-cell lineage tracing in zebrafish using high-resolution infrared laser-mediated gene induction microscopy
Source: eLife. 2020 Jan 6;9:e52024. doi: 10.7554/eLife.52024 (PMC7018510; doi:10.7554/eLife.52024)
Supplement: Figure 4—figure supplement 1—source data 1. [file elife-52024-fig4-figsupp1-data1.xlsx]

## Sheet: Sheet1
Figure 4-supplement 1B
Tg(hsp70l:mCherry-T2a-CreERT2;kdrl:nls-EOS)	Control				Scanning heat shock				Point heat shock
	fish number	total cell	dead cell	percentage of cell death	fish number	total cell	dead cell	percentage of cell death	fish number	total cell	dead cell	percentage of cell death
1st experiment	2	18	1	0.0556	4	21	1	0.0476	5	23	8	0.3478
2nd experiment	4	42	1	0.0238	4	34	0	0	4	27	9	0.3333
3rd experiment	4	29	2	0.069	4	23	0	0	4	20	3	0.15
Figure 4-supplement 1C
Tg(hsp70l:mCherry-T2a-CreERT2;kdrl:nls-EOS)	Control				single spot heat shock (bulk labeling)
	fish number	total cell	dead cell	percentage of cell death	fish number	total cell	dead cell	percentage of cell death
1st experiment	5	34	2	0.0588	5	34	2	0.0588
2nd experiment	5	22	1	0.0455	5	25	0	0
3rd experiment	4	18	0	0	5	25	0	0
