# Supplementary material for: In vivo single-cell lineage tracing in zebrafish using high-resolution infrared laser-mediated gene induction microscopy
Source: eLife. 2020 Jan 6;9:e52024. doi: 10.7554/eLife.52024 (PMC7018510; doi:10.7554/eLife.52024)
Supplement: Source code 1. [file elife-52024-code1.r]

## Set your directory of data
setwd("/Users/MLE")

## heat shocked (A) and control (B) group
A <- read.csv("groupA.csv")
B <- read.csv("groupB.csv")
## T and myeloid cell numbers
ta <- A$T.cells
ma <- A$M.cells
tb <- B$T.cell
mb <- B$M.cells


## Classify of observations in group A
class <- c()
for (i in 1:nrow(A)) {
    if (A[i,1]>0 && A[i,2]>0) class[i] <- 1
    if (A[i,1]>0 && A[i,2]==0) class[i] <- 2
    if (A[i,1]==0 && A[i,2]>0) class[i] <- 3
    if (A[i,1]==0 && A[i,2]==0) class[i] <- 4
}
prop.table(table(class))
y.n <- rep(0, 4)
y.n[c(1,3,4)] <- as.numeric(table(class))
## Classify of observations in group B
class <- c()
for (i in 1:nrow(B)) {
    if (B[i,1]>0 && B[i,2]>0) class[i] <- 1
    if (B[i,1]>0 && B[i,2]==0) class[i] <- 2
    if (B[i,1]==0 && B[i,2]>0) class[i] <- 3
    if (B[i,1]==0 && B[i,2]==0) class[i] <- 4
}
prop.table(table(class))
epsilon.n <- as.numeric(table(class))

############ Descriptive analysis ############
## Histogram
par(mfrow=c(1,2))
hist(tb, breaks = 50, probability = T, xlim=c(0,22), col = 'skyblue', main = "", xlab = "number of T cell")
hist(ta, breaks = 50, probability = T, col = scales::alpha('red',.5), add = T)
hist(mb, breaks = 30, probability = T, xlim=c(0,45), col = 'skyblue', main = "", xlab = "number of M cell")
hist(ma, breaks = 50, probability = T, col = scales::alpha('red',.5), add = T)

plot(ta, ma, col = 'skyblue', xlab = "Number of T cell", ylab = "Number of T cell")
points(tb, mb, col = 'pink')

## Quantiles
by <- 0.01
probs <- seq(0, 1, by)
ta.quan <- quantile(ta, probs)
tb.quan <- quantile(tb, probs)
plot(ta.quan, tb.quan, main = "T cell", xlab = "Group A", ylab = "Group B")
abline(0, 1)
ma.quan <- quantile(ma, probs)
mb.quan <- quantile(mb, probs)
plot(ma.quan, mb.quan, main = "M cell", xlab = "Group A", ylab = "Group B")
abline(0, 1)

############ Discretized model ############
ta0 <- as.numeric(ta > 0)
tb0 <- as.numeric(tb > 0)
ma0 <- as.numeric(ma > 0)
mb0 <- as.numeric(mb > 0)
# table(ta0)
# table(tb0)
# table(ma0)
# table(mb0)
# mean(ta0)
# mean(tb0)
# mean(ma0)
# mean(mb0)

## Log likelihood
ll <- function(p, q) {
    -(epsilon.n[4] * log(1 - q[1] - q[2] - q[3]) + epsilon.n[3] * log(q[3]) + epsilon.n[2] * log(q[2]) + epsilon.n[1] * log(q[1]) + y.n[4] * log((1 - p[1] - p[2] - p[3]) * (1 - q[1] - q[2] - q[3])) + y.n[3] * log(p[3] * (1 - q[1] - q[2] - q[3]) + (1 - p[1] - p[2] - p[3]) * q[3] + p[3] * q[3]) + y.n[2] * log(p[2] * (1 - q[1] - q[2] - q[3]) + (1 - p[1] - p[2] - p[3]) * q[2] + p[2] * q[2]) + y.n[1] * log(p[1] * (1 - q[1] - q[2] - q[3]) + p[1] * q[3] + p[2] * q[3] + p[1] * q[2] + p[3] * q[2] + p[1] * q[1] + p[2] * q[1] + p[3] * q[1] + (1 - p[1] - p[2] - p[3]) * q[1]))
}
ll.grad <- function(p, q) {
    -c(-y.n[4]/(1 - p[1] - p[2] - p[3]) - y.n[3]*q[3]/(p[3] * (1 - q[1] - q[2] - q[3]) + (1 - p[1] - p[2] - p[3]) * q[3] + p[3] * q[3]) - y.n[2]*q[2]/(p[2] * (1 - q[1] - q[2] - q[3]) + (1 - p[1] - p[2] - p[3]) * q[2] + p[2] * q[2]) + y.n[1] * (1 - q[1]) / (p[1] * (1 - q[1] - q[2] - q[3]) + p[1] * q[3] + p[2] * q[3] + p[1] * q[2] + p[3] * q[2] + p[1] * q[1] + p[2] * q[1] + p[3] * q[1] + (1 - p[1] - p[2] - p[3]) * q[1]), 
       -y.n[4]/(1 - p[1] - p[2] - p[3]) - y.n[3]*q[3]/(p[3] * (1 - q[1] - q[2] - q[3]) + (1 - p[1] - p[2] - p[3]) * q[3] + p[3] * q[3]) + y.n[2] * (1 - q[1] - q[2] - q[3]) / (p[2] * (1 - q[1] - q[2] - q[3]) + (1 - p[1] - p[2] - p[3]) * q[2] + p[2] * q[2]) + y.n[1] * q[3] / (p[1] * (1 - q[1] - q[2] - q[3]) + p[1] * q[3] + p[2] * q[3] + p[1] * q[2] + p[3] * q[2] + p[1] * q[1] + p[2] * q[1] + p[3] * q[1] + (1 - p[1] - p[2] - p[3]) * q[1]),
       -y.n[4]/(1 - p[1] - p[2] - p[3]) + y.n[3] * (1 - q[1] - q[2] - q[3]) / (p[3] * (1 - q[1] - q[2] - q[3]) + (1 - p[1] - p[2] - p[3]) * q[3] + p[3] * q[3]) - y.n[2]*q[2]/(p[2] * (1 - q[1] - q[2] - q[3]) + (1 - p[1] - p[2] - p[3]) * q[2] + p[2] * q[2]) + y.n[1] * q[2] / (p[1] * (1 - q[1] - q[2] - q[3]) + p[1] * q[3] + p[2] * q[3] + p[1] * q[2] + p[3] * q[2] + p[1] * q[1] + p[2] * q[1] + p[3] * q[1] + (1 - p[1] - p[2] - p[3]) * q[1]))
}
ll1 <- function(theta) ll(theta[1:3], theta[4:6])

q.ini <- (epsilon.n / sum(epsilon.n))[1:3]
p.ini <- (y.n / sum(y.n))[1:3]
p.ini[2] <- 1e-4
ll(p.ini, q.ini)
p.ini <- print(constrOptim(theta = p.ini, f = ll, grad = ll.grad, ui = rbind(c(-1,-1,-1),  c(1,0,0), c(0,1,0), c(0,0,1), c(-1,0,0), c(0,-1,0), c(0,0,-1)), ci = c(-1,0,1e-5,0,-1,-1,-1), method = "BFGS", q = q.ini))$par

opt <- print(optim(par = c(p.ini, q.ini), fn = ll1, method = "L-BFGS-B", lower = rep(1e-5,6), upper = rep(1,6), hessian = T))

## MLEs for p and q
print(p <- c(opt$par[1:3], 1 - sum(opt$par[1:3])))
print(q <- c(opt$par[4:6], 1 - sum(opt$par[4:6])))

## Confidence interval for q
info <- solve(opt$hessian)
p.se <- sqrt(diag(info)[1:3])
p4.se <- sqrt(c(1,1,1) %*% info[1:3,1:3] %*% c(1,1,1))
p.se <- c(p.se, p4.se)
n <- nrow(A) + nrow(B)
cbind(p - qnorm(0.975) * p.se / sqrt(n), p + qnorm(0.975) * p.se / sqrt(n))

## CI for q
info <- solve(opt$hessian)
q.se <- sqrt(diag(info)[4:6])
q4.se <- sqrt(c(1,1,1) %*% info[4:6,4:6] %*% c(1,1,1))
q.se <- c(q.se, q4.se)
n <- nrow(A) + nrow(B)
cbind(q - qnorm(0.975) * q.se / sqrt(n), q + qnorm(0.975) * q.se / sqrt(n))
